# Supplementary material
Source: PubMed Central journal article supplement (PMC7053833)
Supplement: supp_RA119000198_153521_1_supp_443232_q26xrx.pdf [file supp_RA119000198_153521_1_supp_443232_q26xrx.pdf]

## Supplemental Information

### Tissue-specific analysis of lipid species in *Drosophila* during overnutrition by UHPLC-MS/MS and MALDI-MSI

Bryon F. Tuthill II<sup>1\*</sup>, Louis A. Searcy<sup>2\*</sup>, Richard A. Yost<sup>2\*\*</sup> and Laura Palanker Musselman<sup>1\*\*</sup>

<sup>1</sup>Binghamton University, Department of Biological Sciences, Binghamton, NY, United States of America

<sup>2</sup>University of Florida, Department of Chemistry, Gainesville, FL, United States of America

\*These authors contributed equally to this study.

\*\*Co-corresponding authors: Email: [lmusselm@binghamton.edu](mailto:lmusselm@binghamton.edu) for *Drosophila* or [ryost@chem.ufl.edu](mailto:ryost@chem.ufl.edu) for MALDI-MSI

Running title: Analysis of *Drosophila* lipids during overnutrition

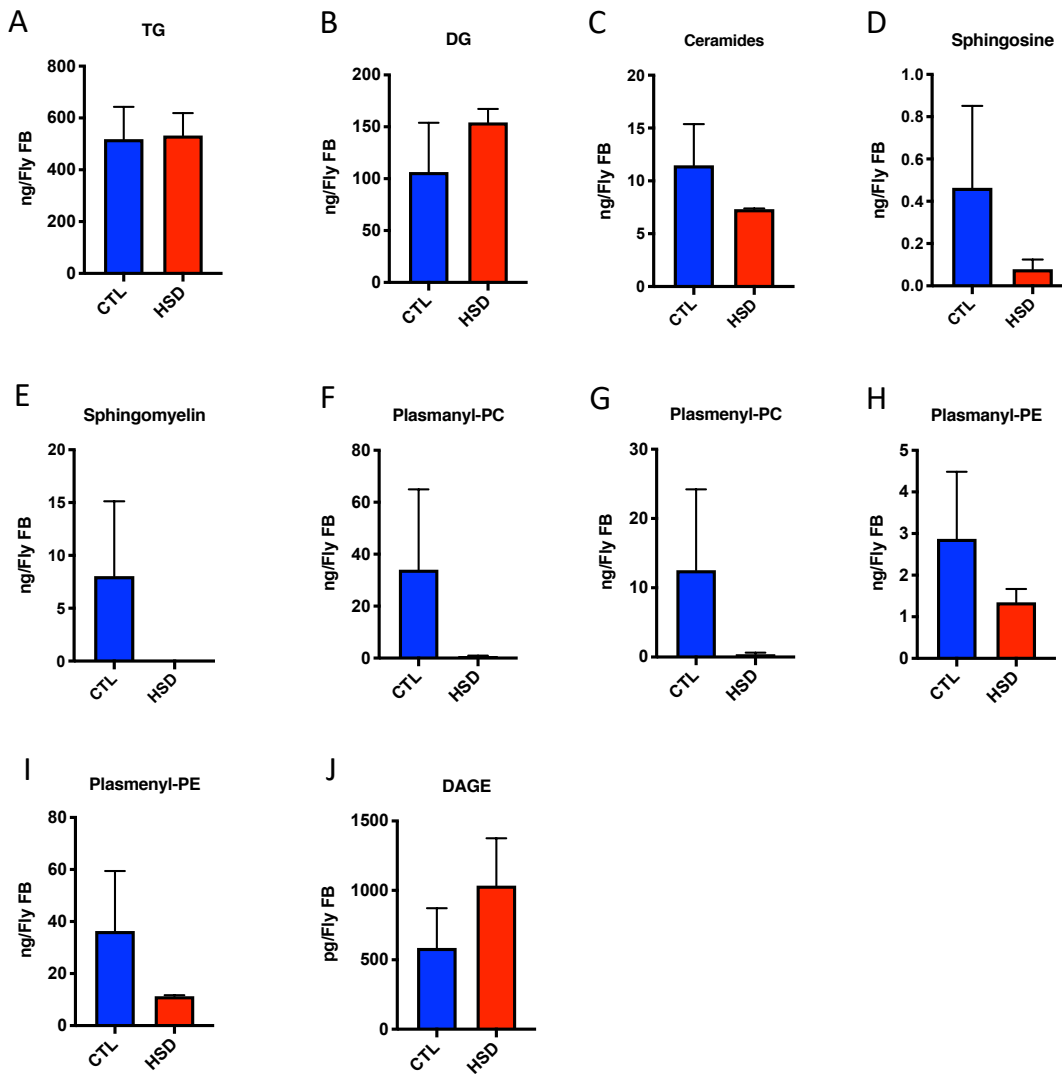

**Supplemental Figure S1: Quantitative analysis of fat body lipids.** Graphs comparing amount of each lipid class detected per fat body. A: TG, B: DG, C: ceramides, D: SO, E: SM, F: Plasmanyl-PC, G: Plasmenyl-PC, H: Plasmanyl-PE, I: Plasmenyl-PE and J: DAGE. Error bars represent the standard error of the mean. No significant differences between control and HS diets were observed at a cutoff of  $p < 0.05$  using a student's t test and Welch's correction.

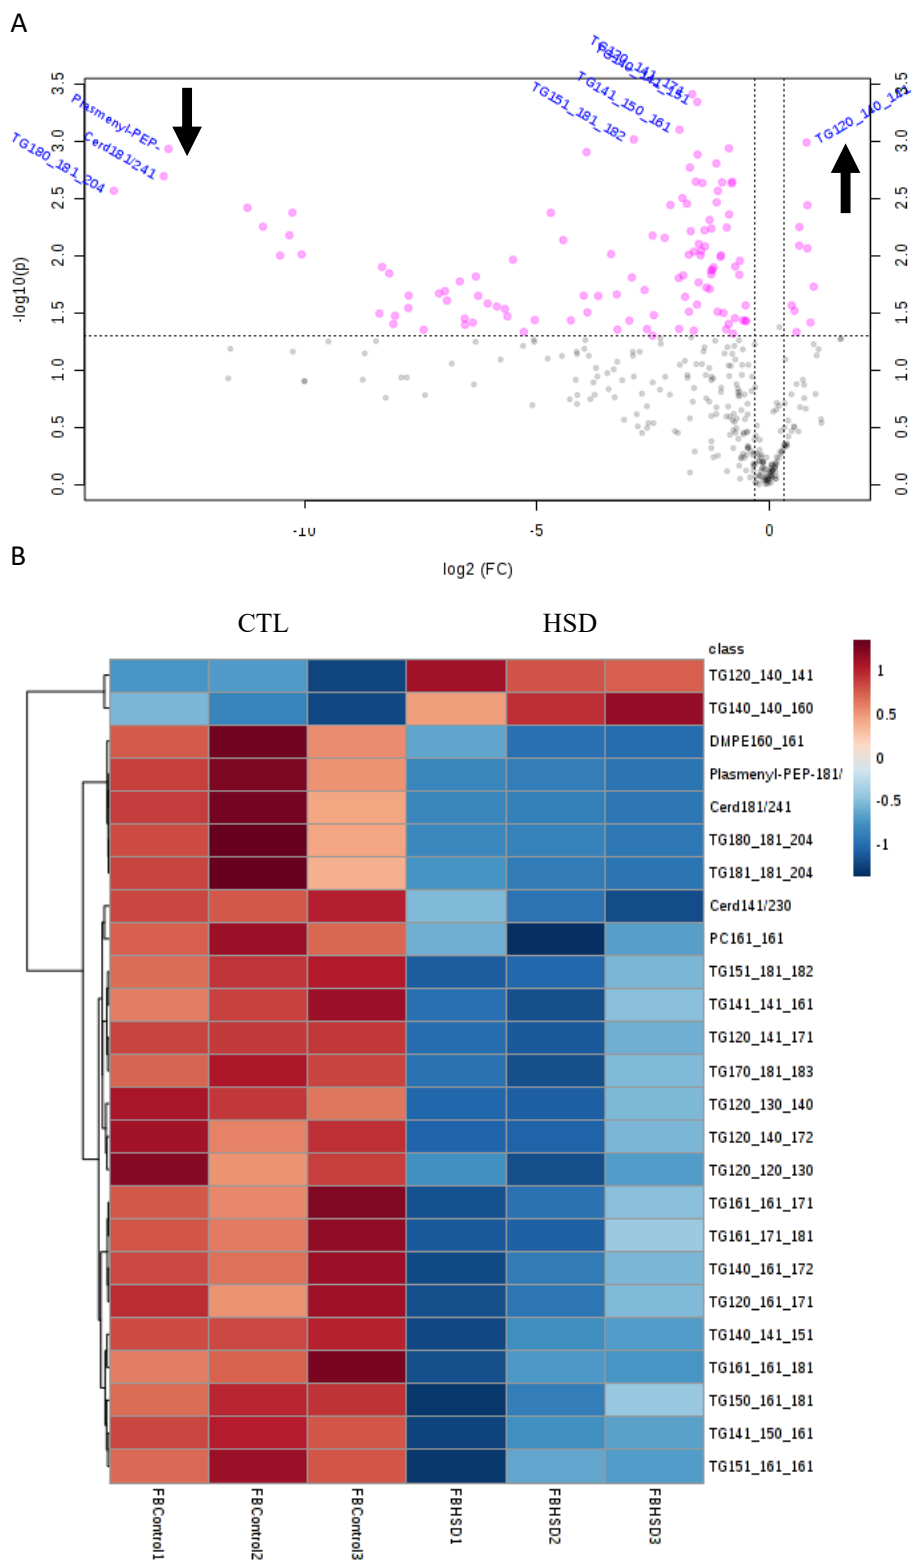

**Supplemental Figure S2: Multivariate analysis of fat body lipids.** A: Volcano plot with fold change cutoffs of 0.75 and 1.25 and p-value cutoff of  $<.05$  (dotted lines). B: Hierarchical clustered heat map indicating the

relative abundance of the top 25 most significantly differentially present lipids in fat bodies from flies aged on control vs HS diets.

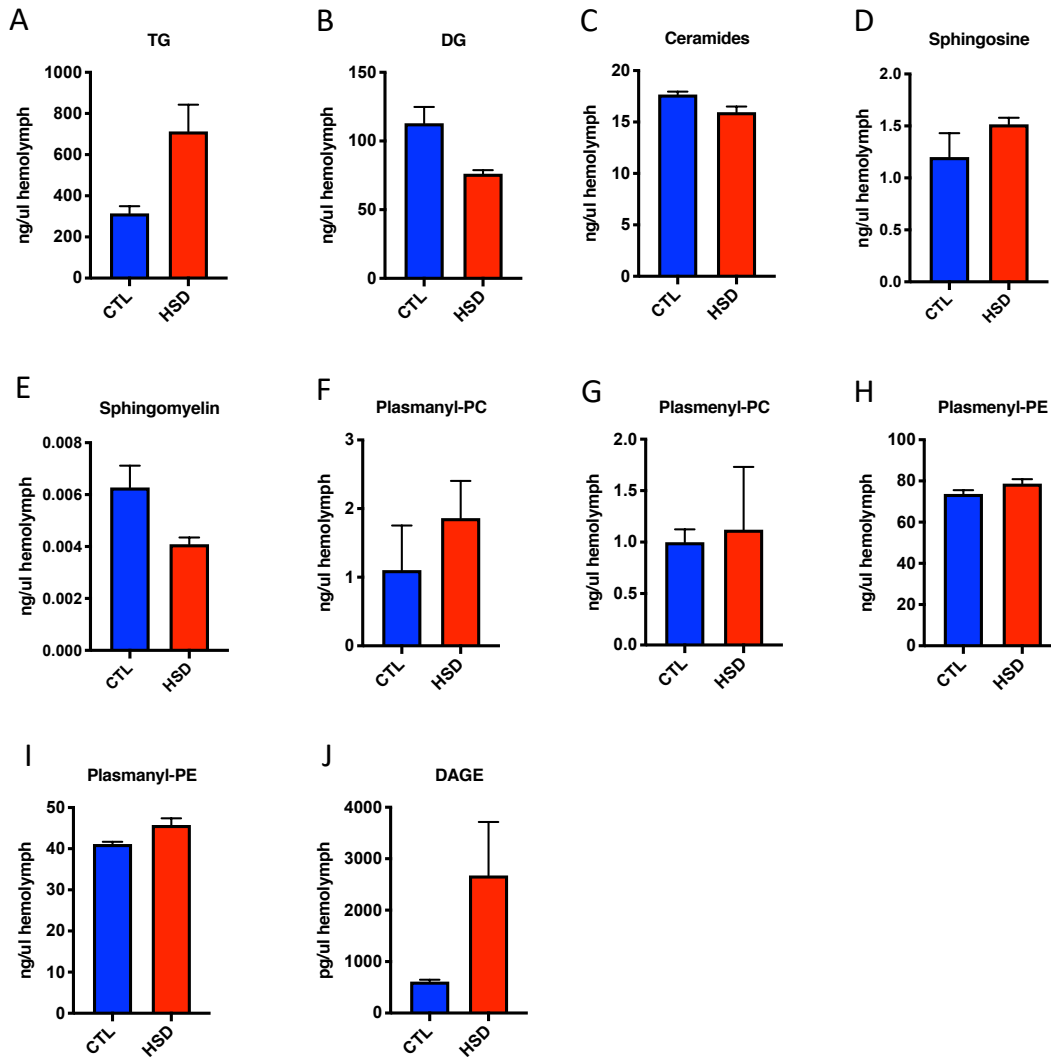

**Supplemental Figure S3: Quantitative analysis of hemolymph lipids.** Graphs comparing amount of each lipid class detected in each microliter of hemolymph. A: TG, B: DG, C: ceramides, D: SO, E: SM, F: Plasmanyl-PC, G: Plasmenyl-PC, H: Plasmanyl-PE, I: Plasmenyl-PE and J: DAGE. Error bars represent the standard error of the mean. No significant differences between control and HS diets were observed at a cutoff of  $p < 0.05$  using a student's t test and Welch's correction.

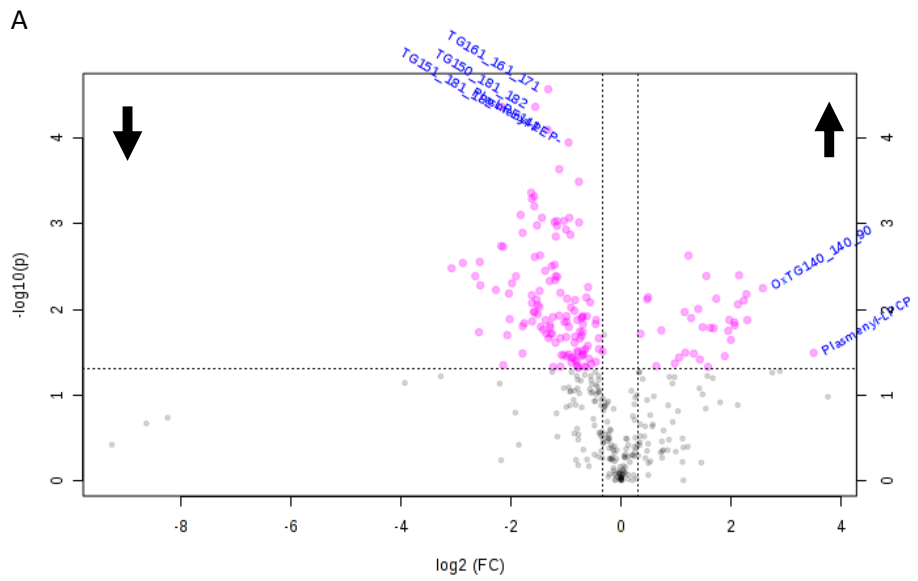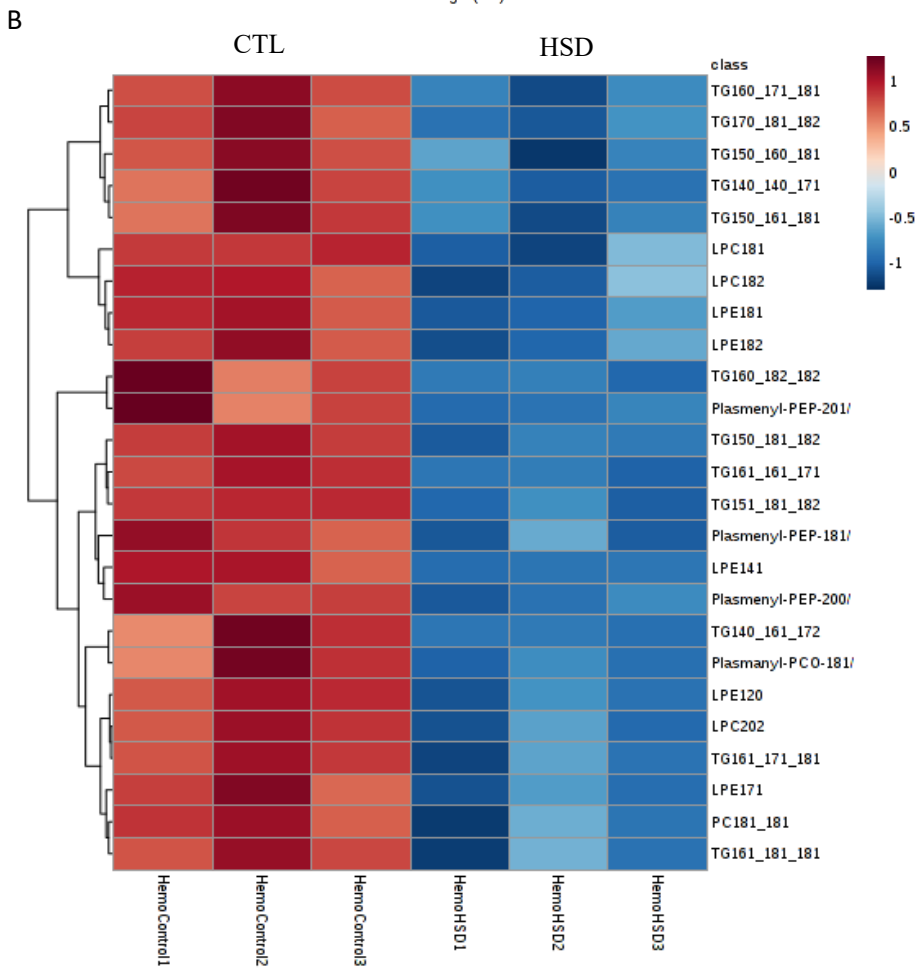

**Supplemental Figure S4: Multivariate analysis of hemolymph lipids.** A: Volcano plot with fold change cutoffs of 0.75 and 1.25 and p-value of  $<.05$  (dotted lines). B: Hierarchical clustered heat map indicating the relative abundance of the top 25 most significantly differentially present lipids in flies aged on control vs HS diets.

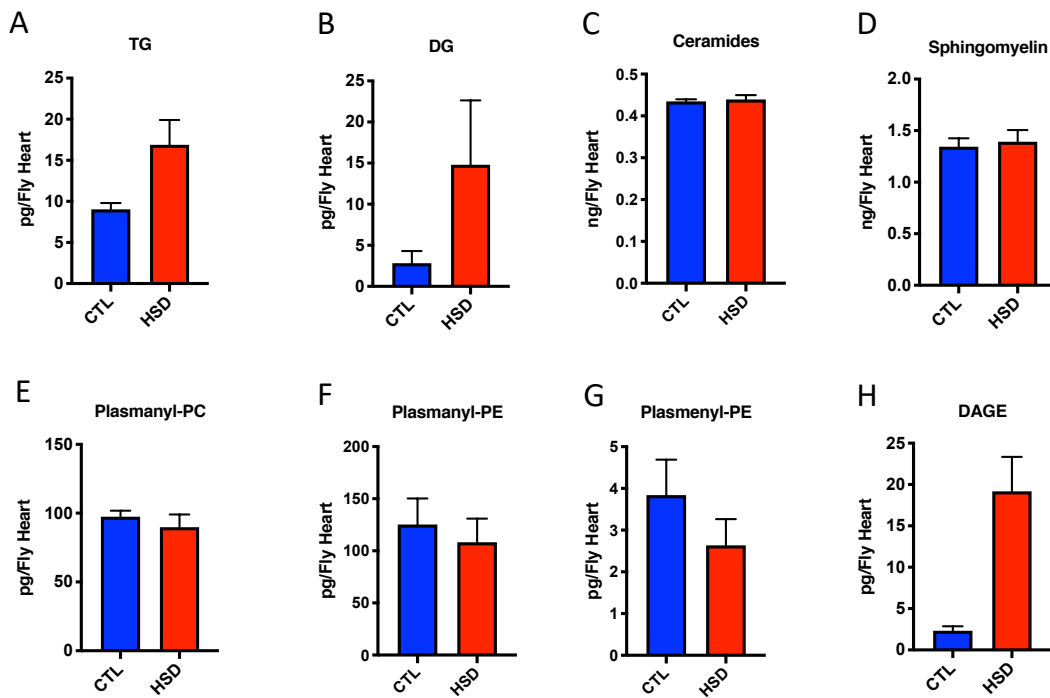

**Supplemental Figure S5: Quantitative analysis of cardiac lipids.** Graphs comparing amount of each lipid class detected in each heart. A: TG, B: DG, C: Ceramides, D: SM, E: Plasmanyl-PC, F: Plasmanyl-PE, G: Plasmeyl-PE and H: DAGE. Error bars represent the standard error of the mean. No significant differences between control and HS diets were observed at a cutoff of  $p < 0.05$  using a student's t test and Welch's correction.

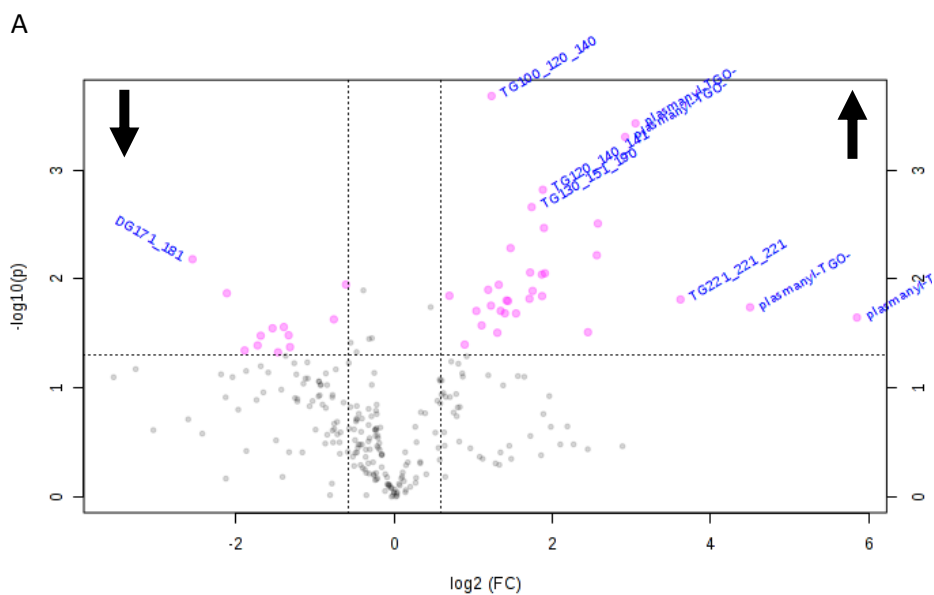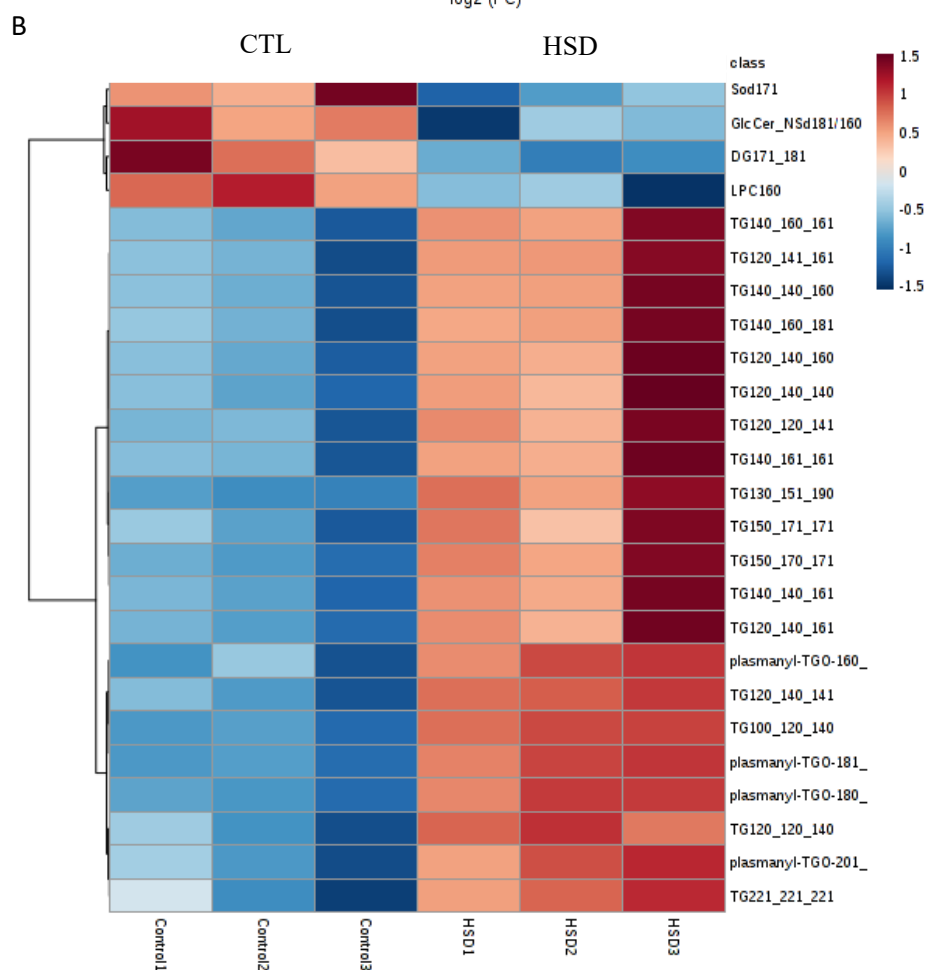

**Supplemental Figure S6: Multivariate analysis of heart lipids.** A: Volcano plot with fold change cutoffs of 0.75 and 1.25 and p-value of <.05 (dotted lines). B: Hierarchical clustered heat map indicating the abundance of the top 25 most significantly differentially present lipids in flies aged on control vs HS diets.

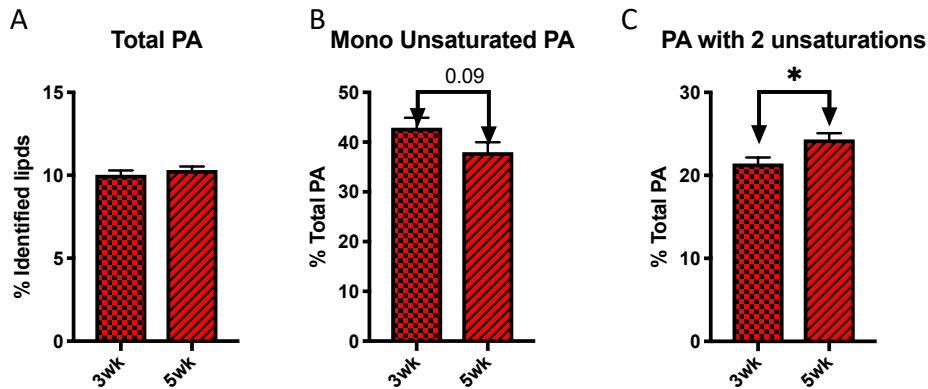

**Supplemental Figure S7: Quantification of phosphatidic acid using MALDI-MSI.** A: Total detected PA, B: Monounsaturated PA, C: polyunsaturated PA detected at 3 and 5 weeks by MALDI-MSI. \* $p < .05$ .

**Supplemental File S1: Volcano table comparing control to HS 5-week FB by UHPLC-MS/MS.** All significantly differentially present compounds identified meeting the criteria of p-value less than 0.05 and a fold change (HS/ctrl) of >25%.

**Supplemental File S2: Volcano table comparing control to HS 5-week hemolymph by UHPLC-MS/MS.** All significantly differentially present compounds identified meeting the criteria of p-value less than 0.05 and a fold change (HS/ctrl) of >25%.

**Supplemental File S3: Volcano table comparing control to HS 5-week heart by UHPLC-MS/MS.** All significantly differentially present compounds identified meeting the criteria of p-value less than 0.05 and a fold change (HS/ctrl) of >25%.

**Supplemental File S4: Volcano table of 3-week FB by MALDI-MSI.** All significantly differentially present compounds identified that had a p-value of less than 0.05 and a fold change (HS/ctrl) of >25%.



**Supplemental File S5: Volcano table of 5-week FB by MALDI-MSI.** All significantly differentially present compounds identified that had a p-value of less than 0.05 and a fold change (HS/ctrl) of >25%.

**Supplemental File S6: Volcano table of 3-week to 5-week control diet comparison of FB by MALDI-MSI.** All significantly differentially present compounds identified that had a p-value of less than 0.05 and a fold change (5 week/3 week) of >25%.

**Supplemental File S7: Volcano table of 3-week to 5-week HS comparison of FB by MALDI-MSI.** All significantly differentially present compounds identified that had a p-value of less than 0.05 and a fold change (5 week/3 week) of >25%.

**Supplemental File S8: Volcano table of 3-week heart by MALDI-MSI.** All significantly differentially present compounds identified that had a p-value of less than 0.05 and a fold change (HS/ctrl) of >25%.

**Supplemental File S9: Volcano table of 5-week heart by MALDI-MSI.** All significantly differentially present compounds identified that had a p-value of less than 0.05 and a fold change (HS/ctrl) of >25%.

**Supplemental File S10: Volcano table of 3-week to 5-week control diet comparison of heart by MALDI-MSI.** All significantly differentially present compounds identified that had a p-value of less than 0.05 and a fold change (5 week/3 week) of >25%.

**Supplemental File S11: Volcano table of 3-week to 5-week HS comparison of heart by MALDI-MSI.** All significantly differentially present compounds identified that had a p-value of less than 0.05 and a fold change (5 week/3 week) of >25%.
